# Supplementary material for: Ectodysplasin/NF-κB Promotes Mammary Cell Fate via Wnt/β-catenin Pathway
Source: PLoS Genet. 2015 Nov 18;11(11):e1005676. doi: 10.1371/journal.pgen.1005676 (PMC4651331; doi:10.1371/journal.pgen.1005676)
Supplement: S1 Table — Only genes displaying a q-value <0.05 at least in one of the three statistical analyses are included. Log2 indicates (log2(Fc-Eda-treatment)-log2(control)). (XLSX) [file pgen.1005676.s006.xlsx]

## Sheet: Sheet1
Gene		log2	limma_qval	ibmt_qval	cybert_qval
Upregulated
Clca2		2.29978	4.70323e-05	1.16871e-05	6.95764e-06
Tnf		2.13838	0.000552352	0.000147271	2.14774e-05
Dkk4		1.98056	0.000491696	0.000114625	6.95764e-06
Nos2		1.89941	4.70323e-05	1.16871e-05	9.7077e-06
Clca1		1.80152	0.000699355	0.000245689	0.000182626
Madcam1		1.6975	0.00378361	0.00113476	0.000290416
Cxcl10		1.62753	0.0070074	0.00200531	4.48766e-05
Cxcl2		1.47998	0.0125373	0.00495771	0.000200371
Gbp3		1.46153	0.00773287	0.00289034	0.000118085
Foxi3		1.42959	0.0259472	0.00890801	0.000118085
Serpina3i		1.30119	0.0494568	0.0250581	0.000508254
Pion		1.29458	0.000552352	0.000207336	0.000339396
Cxcl11		1.28902	0.0376541	0.0159552	0.0019213
Stap2		1.23444	0.00166968	0.000411336	0.000105872
Icam1		1.2059	0.00029044	2.41941e-05	6.19024e-06
Cd74		1.17348	0.000420775	0.00017688	0.00159218
Relb		1.16306	0.000983625	0.000294992	0.000384733
Kcng3		1.15047	0.00134312	0.000563538	0.00109526
Tnfaip3		1.14023	0.000141915	3.39956e-05	0.000118085
Adamts15		1.13347	0.0478165	0.0230605	0.0153971
Wnt10b		1.13326	0.00277362	0.000670289	5.46604e-05
Ltb		1.13128	0.000983625	0.000418931	0.000118085
Tapbp		1.11185	0.00120142	0.000228803	0.000326477
Ifit1		1.0979	0.19009	0.119776	0.00952339
Irgm2		1.08522	0.0634031	0.03249	0.00197556
H2-Gs10		1.06758	0.00132985	0.000546404	0.000200371
Cxcl9		1.067	0.0177267	0.00848534	0.0105159
Ptch2		1.06085	0.00134312	0.000299763	8.73765e-05
Mmp9		1.05811	0.00583365	0.00165826	5.10282e-05
Cd82		1.03434	0.00163094	0.000377748	0.000426406
Rasgef1b		1.00914	0.00200398	0.000546404	0.000339396
Fgf17		0.968768	0.0507387	0.0250581	0.0364826
Gm12764		0.963509	0.0269125	0.015169	0.0544406
Ifi44		0.963173	0.226648	0.15211	0.023266
Oasl2		0.955082	0.204901	0.131925	0.0048115
Irgm1		0.951284	0.119752	0.0723096	0.00142264
Wnt10a		0.940544	0.0199048	0.00641929	0.000564387
Sema3e		0.939877	0.0228313	0.00830211	0.000928953
Lrp4		0.932189	0.00029044	2.1112e-05	6.95764e-06
Rtp4		0.894794	0.0780649	0.0429031	0.000290416
Plk2		0.894483	0.00321661	0.000570476	4.48766e-05
Gm11710		0.882049	0.00583365	0.00387207	0.0469366
Usp18		0.860798	0.31574	0.227577	0.0043202
Mark1		0.85661	0.00527029	0.00118926	8.73765e-05
Nfkb2		0.839243	0.000673581	0.000147271	0.000426406
Gm6781		0.83661	0.0287733	0.018437	0.0803854
Cx3cl1		0.829183	0.0100433	0.0031286	0.00430034
Dusp6		0.826677	0.0059332	0.00126928	8.73765e-05
Ntng2		0.824798	0.00134312	0.00108332	0.0249978
Ikbke		0.819031	0.00302526	0.0018113	0.00793511
4930577N17Rik		0.817029	0.176083	0.120038	0.0168266
Kremen2		0.810396	0.00176106	0.000294992	0.000508254
Trib1		0.806461	0.000673581	0.00017688	0.000656127
Ifitm3		0.799157	0.00938193	0.00206914	0.000339952
Nfkbie		0.798434	0.00148323	0.00108332	0.00808521
Art4		0.796274	0.0634031	0.0305208	0.00568777
Cd83		0.792253	0.0477942	0.0254416	0.0372297
Olfr410		0.785232	0.323977	0.247619	0.788637
Stx11		0.784217	0.00134312	0.000522908	0.00224994
Dtx3l		0.782355	0.240207	0.164816	0.00793511
Hist1h3h		0.77762	0.355472	0.277893	0.0831708
Mapk4		0.775426	0.0696596	0.0383127	0.00844837
Parp14		0.774576	0.0727421	0.0466558	0.0106667
Rnf213		0.774076	0.153429	0.0906856	0.00856673
Plk3		0.773484	0.00152172	0.000506698	0.000961969
Gbp2		0.764581	0.254635	0.180926	0.0140475
Cxcr4		0.734836	0.0376541	0.0222936	0.0105159
Birc3		0.727907	0.00196156	0.000411336	0.000426406
Slc9a7		0.72408	0.00551841	0.00476902	0.0395637
Itpripl2		0.719417	0.0892948	0.0505641	0.0105024
Stat1		0.717268	0.105214	0.0565333	0.0185741
Oas1a		0.711795	0.076456	0.0465844	0.0529285
Mab21l3		0.709299	0.0154197	0.00533146	0.00288439
Rpl31-ps6		0.708464	0.380191	0.311002	0.0582759
Cd200		0.707962	0.0294636	0.0110467	0.000926517
Ifit3		0.699412	0.258549	0.178913	0.000426406
Mx2		0.698586	0.337887	0.261082	0.0150115
Nfkbia		0.695761	0.00797377	0.00174982	0.000200371
Plxnd1		0.692793	0.0254935	0.00742404	0.00430034
Etv4		0.690468	0.0134047	0.00726192	0.0122164
Ptgs2		0.688509	0.100243	0.0610378	0.00280278
Pstpip2		0.684535	0.0200158	0.0145797	0.0715191
Shh		0.682577	0.0143474	0.00919344	0.0306395
Tnip1		0.681042	0.000983625	0.000264576	0.00382668
Parp12		0.669314	0.118192	0.067878	0.00507201
Rab32		0.664378	0.00773287	0.00238067	0.0035496
4930447M23Rik		0.653495	0.0346417	0.0176649	0.00769337
Spry4		0.650027	0.0714258	0.0313139	0.00168981
Csf1		0.643137	0.00414761	0.00144484	0.00728541
Gm13716		0.638905	0.00190034	0.0031286	0.0449185
Ifngr2		0.634539	0.0125373	0.0028018	0.000290416
Cdkn1a		0.629405	0.0447215	0.0159477	0.00118638
Tmem173		0.627933	0.014851	0.00357291	0.000383811
Epha2		0.621753	0.00908001	0.00357291	0.00288755
mt-Tl2		0.620783	0.188436	0.114372	0.00507201
Prnd		0.616602	0.00878743	0.00245038	0.013443
Tspan18		0.611883	0.0376541	0.0116373	0.00129768
Calhm2		0.608065	0.0267481	0.015169	0.0372897
Traf5		0.601969	0.0565496	0.0250581	0.00215742
Phlda3		0.599177	0.00166968	0.000250551	0.000383811
Edar		0.595865	0.019035	0.00785537	0.00547074
Gm15803		0.595733	0.0411729	0.0360722	0.321204
Cyba		0.588684	0.016095	0.00387207	0.00462861
Gbp4		0.587149	0.147319	0.11104	0.0435744
Cdcp1		0.585682	0.0404694	0.0159477	0.00365655
Fzd10		0.581741	0.0696596	0.0311318	0.0813058
Bmp2		0.578046	0.0871663	0.0475683	0.0248888
Aff2		0.57732	0.00797377	0.00244557	0.00288755
Il23a		0.571833	0.0503949	0.0432219	0.29972
St3gal3		0.570879	0.00416826	0.000707145	0.00721957
Ern1		0.568609	0.0125373	0.0031286	0.00455102
Psmb10		0.567177	0.00767952	0.0018113	0.000656127
Ifih1		0.565861	0.122347	0.0813725	0.018802
Edn3		0.564659	0.0125373	0.00476902	0.00762151
Obfc2a		0.563749	0.0174275	0.00602444	0.00430034
Cntnap1		0.562908	0.0160055	0.0114329	0.195675
Cd44		0.562456	0.00754618	0.00111381	0.000508254
Eif4e		0.556849	0.233539	0.168253	0.026343
Trim21		0.556063	0.172405	0.103056	0.0104435
Tnip3		0.5554	0.00949033	0.0159477	0.407888
Whamm		0.555079	0.00643541	0.0018323	0.0153971
Cmpk2		0.554905	0.126588	0.082609	0.0245361
B2m		0.552981	0.0259472	0.00604514	0.00159218
Ccl17		0.549272	0.0674775	0.048555	0.0937586
Tmem176a		0.545391	0.00267626	0.000465717	0.00547074
Pthlh		0.544965	0.0503949	0.0219814	0.0193752
Erap1		0.538644	0.0565496	0.0359172	0.0183138
Susd4		0.533454	0.0343766	0.010471	0.00150251
Btg2		0.530183	0.0329827	0.0103871	0.0160589
Sema6d		0.528083	0.00457068	0.000655456	0.0014665
Bhlhe40		0.527713	0.00527029	0.000816678	0.00150251
Trim25		0.525337	0.195828	0.126817	0.0264539
7SK		0.525291	0.254167	0.192489	0.742715
Mageb4		0.518937	0.0376541	0.0371846	0.511705
Kcne4		0.518646	0.181086	0.111322	0.0121114
Sema4c		0.513886	0.0160055	0.00376976	0.00351404
Gm12778		0.511997	0.265861	0.188124	0.0183138
Map3k8		0.511938	0.0507387	0.0270403	0.0176062
Clstn1		0.50494	0.0614298	0.0221648	0.0104435
Irf1		0.504036	0.00977298	0.00606948	0.0174768
Parp9		0.498867	0.276854	0.206861	0.0100818
H2-K1		0.488787	0.00773287	0.00495771	0.0219363
Rel		0.488174	0.0343766	0.0103584	0.00482568
Efna1		0.48451	0.0376541	0.0120476	0.00453088
Trim12a		0.48352	0.0376541	0.0485873	0.355773
Mpped1		0.48164	0.00378361	0.0018113	0.040046
Egr1		0.479329	0.293509	0.199349	0.00482568
6230427J02Rik		0.478049	0.181086	0.106914	0.00715009
Sik1		0.476601	0.0124248	0.0018323	0.0100818
Traf3		0.475544	0.019035	0.00670964	0.0168266
Bcl3		0.473461	0.0727421	0.0345202	0.0185741
Tor3a		0.47177	0.117088	0.066126	0.0279273
Ctgf		0.467908	0.219215	0.15211	0.018802
Hist1h4c		0.466129	0.197028	0.11104	0.00507201
Dusp2		0.463734	0.0235666	0.0170692	0.146062
Fam83b		0.463634	0.140185	0.0702107	0.00728541
Kcnn1		0.459904	0.0696596	0.0498812	0.234263
Lef1		0.458834	0.120361	0.0591665	0.0192672
Xdh		0.456808	0.0160102	0.00919344	0.0223952
Eif2ak2		0.455574	0.0976046	0.0498812	0.026343
Slc40a1		0.454074	0.0329827	0.00961657	0.0168338
Diras2		0.453351	0.250317	0.183085	0.0480902
Twsg1		0.448643	0.0401316	0.0103584	0.00741895
St5		0.442791	0.0614298	0.024363	0.00990004
Hist1h3d		0.441621	0.256799	0.182771	0.0349186
F2rl1		0.438848	0.15591	0.0834513	0.00847269
Ube2l6		0.437638	0.0566688	0.0279016	0.175623
B4galnt1		0.437321	0.0329827	0.0103584	0.02214
Psmb8		0.434259	0.0452046	0.0644394	0.56374
Gtf2b		0.431777	0.16863	0.0880781	0.0248015
Pde10a		0.430441	0.0315996	0.0115218	0.0174768
Sema3d		0.429507	0.113908	0.0520019	0.0303376
Gm13815		0.429124	0.140185	0.105402	0.149518
Tagln3		0.420139	0.028213	0.0159477	0.128475
Aif1		0.417909	0.0346417	0.0475683	0.389952
Gbp8		0.417158	0.0269644	0.0532591	0.438967
Robo1		0.415722	0.0871663	0.0345202	0.0220957
Ptprg		0.409017	0.128265	0.0635646	0.0114343
Kera		0.408445	0.675867	0.63255	0.0426962
Vcam1		0.40832	0.16934	0.0895906	0.0415137
4922501C03Rik		0.406896	0.0646024	0.0310182	0.025917
Sptlc3		0.404429	0.308965	0.22606	0.0296884
Ppap2a		0.4018	0.149352	0.085563	0.0301552
Myo1d		0.400577	0.0376541	0.0110467	0.00990004
Tekt5		0.391941	0.0288038	0.0265527	0.126502
Sdc4		0.388844	0.0849362	0.0313139	0.00741895
1110028C15Rik		0.387334	0.171964	0.10107	0.040046
Pawr		0.386795	0.0228313	0.00919344	0.122805
Dusp1		0.385637	0.117088	0.0535295	0.02007
Gm15074		0.385124	0.188436	0.0988639	0.0376454
Gm14053		0.384876	0.639169	0.602747	0.939451
Moxd1		0.384687	0.0654926	0.0250581	0.015043
Tnfrsf19		0.382929	0.181731	0.0922801	0.0343187
Bcl10		0.377878	0.0717574	0.0295063	0.0174768
Tm4sf1		0.377294	0.26262	0.164904	0.044738
Sox13		0.375701	0.0674775	0.0359172	0.198209
Zfp36		0.37517	0.0267481	0.00495771	0.0200677
Myo1e		0.366089	0.0259472	0.00476902	0.0189078
Rerg		0.363167	0.0942738	0.0377922	0.0635425
Gm13637		0.363117	0.0942738	0.0359172	0.278295
Tmem176b		0.362865	0.0453865	0.00830211	0.0112042
Rras		0.355894	0.0321109	0.00495771	0.0937586
Nfkb1		0.349412	0.0376541	0.00919344	0.0271549
Ppard		0.3474	0.0634528	0.019576	0.0820214
Sntb1		0.345095	0.168198	0.0818835	0.0343174
Lgr4		0.344906	0.0924484	0.0328965	0.0681277
Nrg1		0.344248	0.0696596	0.0377922	0.105912
Il1r1		0.343483	0.188436	0.101458	0.0384806
Myo10		0.342705	0.0241433	0.00350668	0.0503028
Tagln2		0.338214	0.0376541	0.0103855	0.0544406
Fas		0.335377	0.0446082	0.0812881	0.382237
Trp63		0.3301	0.0691896	0.018437	0.0475239
Urb1		0.329953	0.0343766	0.0147054	0.115822
Trp53		0.329903	0.0414245	0.0100455	0.0820214
Cdc42ep3		0.325198	0.137689	0.075604	0.0349186
Jarid2		0.321337	0.0376541	0.00519632	0.0593753
Adamts17		0.321298	0.0681077	0.0197527	0.156908
Eif2b3		0.320484	0.117088	0.0531184	0.0445866
Gpcpd1		0.319522	0.0892948	0.036275	0.0702064
B4galt1		0.319	0.0797482	0.0219814	0.0378013
Hivep1		0.317388	0.0780649	0.0218307	0.0248888
Myc		0.316849	0.0942738	0.0345202	0.105361
Klf10		0.316389	0.122736	0.0609298	0.0320828
Atp1b1		0.313212	0.455176	0.36318	0.040046
Il6st		0.311109	0.119049	0.0432801	0.0193752
Nfkbib		0.302703	0.0565496	0.010419	0.0796327
Eml4		0.292838	0.0665636	0.0117287	0.040046
Parm1		0.292529	0.0727421	0.0158789	0.0911632
Ralbp1		0.292256	0.126586	0.0509645	0.0435916
Atp8a1		0.288658	0.0797482	0.0426472	0.147942
Tns3		0.285804	0.0679837	0.015169	0.0363015
Bysl		0.283768	0.0897628	0.0338716	0.120507
Kif13a		0.28225	0.100554	0.0338716	0.0632397
Sh3rf1		0.281724	0.099258	0.0432801	0.0817886
Med27		0.28074	0.107609	0.0411748	0.0898759
Plagl2		0.27679	0.0727421	0.0170692	0.229976
Zfp36l1		0.275289	0.0814163	0.019576	0.0803854
Gm12231		0.273827	0.63028	0.575661	0.0489447
Rgs12		0.267493	0.0665636	0.0398752	0.253529
Eif2s1		0.264304	0.0892752	0.0174767	0.073858
Nkrf		0.256998	0.102085	0.0429031	0.102814
Fbxo30		0.251365	0.0907363	0.0250581	0.125629
Ikbkb		0.250983	0.099258	0.0498812	0.171031
Rbmxrt		0.233179	0.156217	0.0426472	0.187702
Cttnbp2nl		0.220613	0.131701	0.0482369	0.324865
Downregulated
Slc6a9		-0.281029	0.0727421	0.0229346	0.17697
Lgr6		-0.283682	0.51806	0.438437	0.0388589
Mfge8		-0.302797	0.080198	0.0211909	0.0544406
Dixdc1		-0.313618	0.0727421	0.0455798	0.391346
Ripply3		-0.32144	0.0696596	0.019576	0.0722938
Pitpnm2		-0.330793	0.0259472	0.00486759	0.0647881
S1pr1		-0.335511	0.0797482	0.0298073	0.0761587
Zfp260		-0.341953	0.0446082	0.00848534	0.0363284
Spock2		-0.342099	0.0942738	0.0609298	0.0473421
Cpt1a		-0.344948	0.0443206	0.00919344	0.0340628
Zfp467		-0.345998	0.0478165	0.0159477	0.0301552
Mmp11		-0.351306	0.246737	0.15211	0.0338317
Sostdc1		-0.357971	0.266187	0.164904	0.040046
Gm16696		-0.364712	0.530196	0.459788	0.0463108
Jag2		-0.366171	0.0565496	0.0158789	0.0100818
Acaa2		-0.367496	0.0960466	0.0345202	0.0114343
Gm14428		-0.367735	0.175157	0.0889526	0.00728541
Mertk		-0.367781	0.0574342	0.0225649	0.276168
Reep6		-0.368395	0.17517	0.0892545	0.00844837
Gm12460		-0.378069	0.323977	0.222183	0.0499257
Htr5b		-0.390013	0.0329827	0.0532591	0.382832
1810041L15Rik		-0.398369	0.464309	0.385118	0.0490437
Cxcl14		-0.403922	0.331783	0.227051	0.00507201
Gm8482		-0.40708	0.336481	0.246926	0.026343
Sorcs3		-0.407655	0.0507387	0.0432801	0.221779
5830472F04Rik		-0.411756	0.080198	0.0394417	0.270559
St8sia4		-0.415739	0.129707	0.0763639	0.0148095
Prss8		-0.417218	0.0453208	0.0164971	0.161438
Gstt3		-0.430428	0.255967	0.170906	0.0198248
Mmp16		-0.431432	0.258549	0.180926	0.324865
Igfbp5		-0.431755	0.113124	0.049596	0.0115197
Dach2		-0.435871	0.0419752	0.0504737	0.617657
Map2k6		-0.445206	0.0199048	0.00604514	0.0124846
Vdr		-0.447212	0.13969	0.0818835	0.036208
Gm70		-0.453173	0.080706	0.0565694	0.046087
Gm12650		-0.454581	0.658994	0.621315	0.820044
Ankrd44		-0.462825	0.0566688	0.0223217	0.104122
Smoc2		-0.462928	0.0401316	0.0122105	0.00585571
Fancb		-0.464302	0.0494568	0.0328965	0.0837331
Slc44a2		-0.465488	0.016095	0.00265876	0.0114756
Prss35		-0.483361	0.18117	0.114415	0.0338987
Srd5a1		-0.504788	0.0245131	0.00602055	0.00777633
Gm14514		-0.506132	0.319997	0.252166	0.409008
Car3		-0.515188	0.7452	0.72105	0.0193752
Fxyd3		-0.516143	0.0691896	0.0254416	0.00227226
Mir205		-0.523852	0.341017	0.257296	0.0243134
Pcdh11x		-0.531283	0.0561572	0.0313139	0.0630459
Gm12617		-0.540376	0.56814	0.511178	0.0415255
Gm6646		-0.542718	0.0388442	0.0211881	0.0817886
Gm13943		-0.551515	0.0376541	0.0313139	0.14785
Pcdh9		-0.551619	0.0329827	0.0114329	0.00846962
Pou2f3		-0.55493	0.012457	0.0026548	0.00365655
Fry		-0.556009	0.00321661	0.00080148	0.0100818
Gm15755		-0.559479	0.27992	0.1976	0.0171952
Gm10301		-0.560236	0.219416	0.142852	0.00982597
Cecr6		-0.560733	0.340982	0.251899	0.00453088
Vsnl1		-0.574447	0.0212452	0.00848534	0.0372444
A930038C07Rik		-0.582932	0.181115	0.101458	0.00124199
Olfr503		-0.58487	0.358776	0.293234	0.044738
Srgap3		-0.593633	0.0133043	0.00495771	0.0469366
Gm13642		-0.610535	0.306353	0.239706	0.0482865
Cldn8		-0.621867	0.0376541	0.0159477	0.0245361
Gpr149		-0.632706	0.0376541	0.0305097	0.172086
Gm3848		-0.633929	0.0376541	0.0329653	0.0912194
Nos1		-0.647183	0.00643541	0.00428477	0.0191085
5830418P13Rik		-0.648047	0.00414761	0.00495771	0.046087
Gm13610		-0.648295	0.258549	0.194043	0.0431402
Olfr213		-0.658715	0.226629	0.175677	0.0394776
Cmtm2a		-0.7111	0.272399	0.209743	0.0340628
Spon2		-0.722425	0.0614298	0.0345202	0.00898718
Gm12773		-0.763859	0.19658	0.133884	0.026343
Foxf2		-0.787189	0.0329827	0.0197147	0.0300169
Mir203		-0.791214	0.0267481	0.0183248	0.010797
Gm8165		-0.810003	0.230208	0.164904	0.0271549
Mospd2		-0.860289	0.00188727	0.000465717	0.00029557
Gm14701		-0.872619	0.0791417	0.0529514	0.033908
SNORA17		-1.01684	0.0727421	0.0450817	0.0911632
Kif2b		-1.04923	0.0376541	0.0197527	0.0372444
