# Supplementary material for: Ectodysplasin/NF-κB Promotes Mammary Cell Fate via Wnt/β-catenin Pathway
Source: PLoS Genet. 2015 Nov 18;11(11):e1005676. doi: 10.1371/journal.pgen.1005676 (PMC4651331; doi:10.1371/journal.pgen.1005676)
Supplement: S2 Table — (XLSX) [file pgen.1005676.s007.xlsx]

## Sheet: Sheet1
		Gene	Forward primer (5´- 3´)			Reverse primer (5´- 3´)
		Adamts15	GAGCTGGGCCATGTGTTC			CACCTCCTCACACACCTTCAC
		Icam1	CTTCCAGCTACCATCCCAAA			CTTCAGAGGCAGGAAACAGG
		Kremen2	GTCGACGGAGCTGTCTGC			TACCACACAGCCCAGCTTCT
		Lgr4	TTCGCATTCACCAACCTTTC			TTCAAGTCCAGGGTTTCCAG
		Madcam1	AGTCGAAGCTTCCAGCACTC			GAGAGACTGTTCGGGTCTGC
		Mmp9	CATTCGCGTGGATAAGGAGT			CACTGCAGGAGGTCGTAGG
		Clca1/2	GAAGCAACAAGGTGTTCCAC			ATTCAACCACAGAATTAAGG
